# Supplementary material
Source: PubMed Central journal article supplement (PMC2844090)

## Supporting Information

### **Structural insight into the inhibition of human kynurenine aminotransferase I /glutamine transaminase K**

Qian Han<sup>†\*</sup>, Howard Robinson<sup>‡</sup>, Tao Cai<sup>#</sup>, Danilo A. Tagle<sup>§</sup> and Jianyong Li<sup>†</sup>

\* Corresponding author: Department of Biochemistry, Virginia Tech, Engel Hall  
204/206, Blacksburg, VA 24061, USA; Phone: 540-231-5779; Fax: 540-231-9070; E-  
mail: [qianhan@vt.edu](mailto:qianhan@vt.edu).

Fig - S1

This figure shows the omit map covering Tris and the around area calculated without Tris. The  $F_o - F_c$  electron density map is contoured at the 0.8 sigma level.

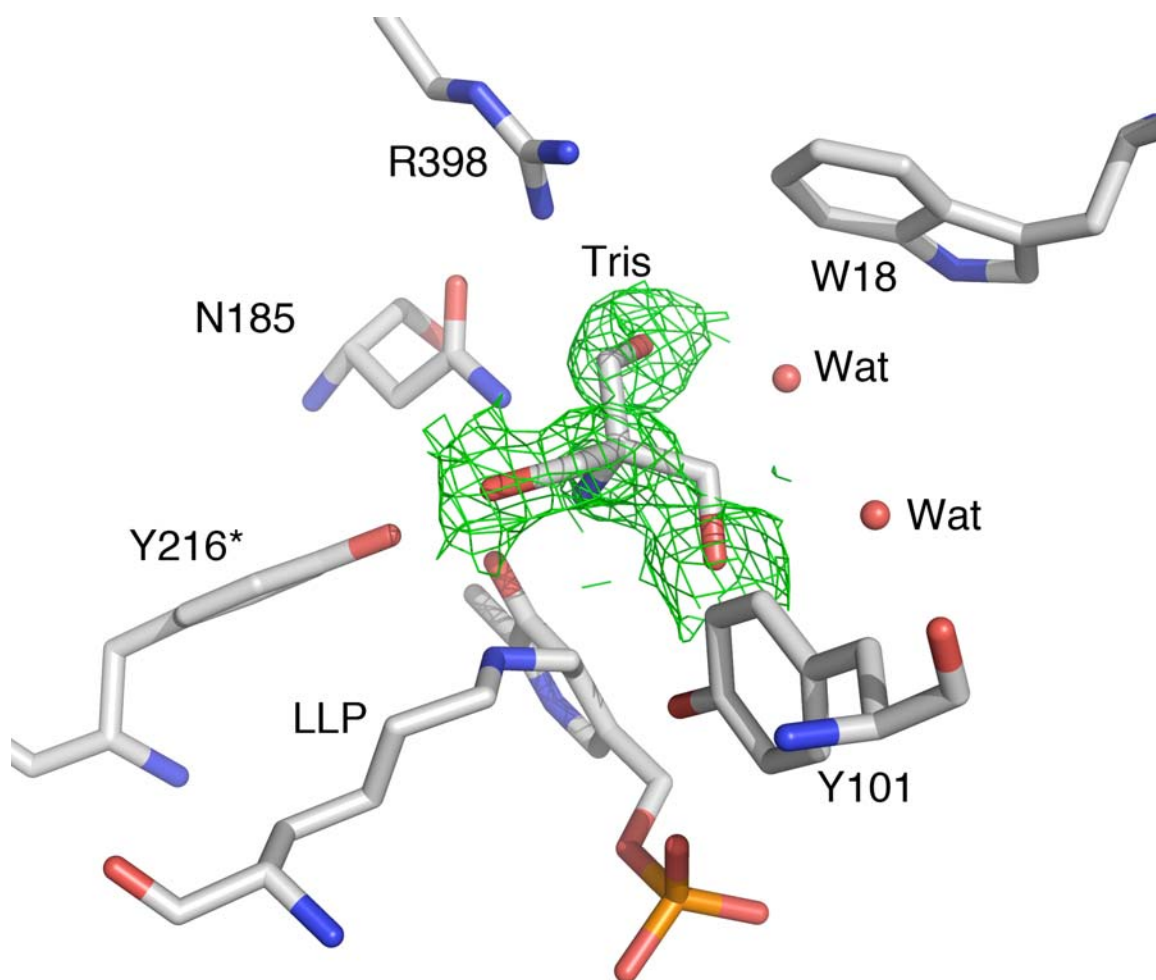

Fig – S2

This figure shows the omit map covering GOL and the around area calculated without GOL. The  $F_o - F_c$  electron density map is contoured at the 1.5 sigma level.

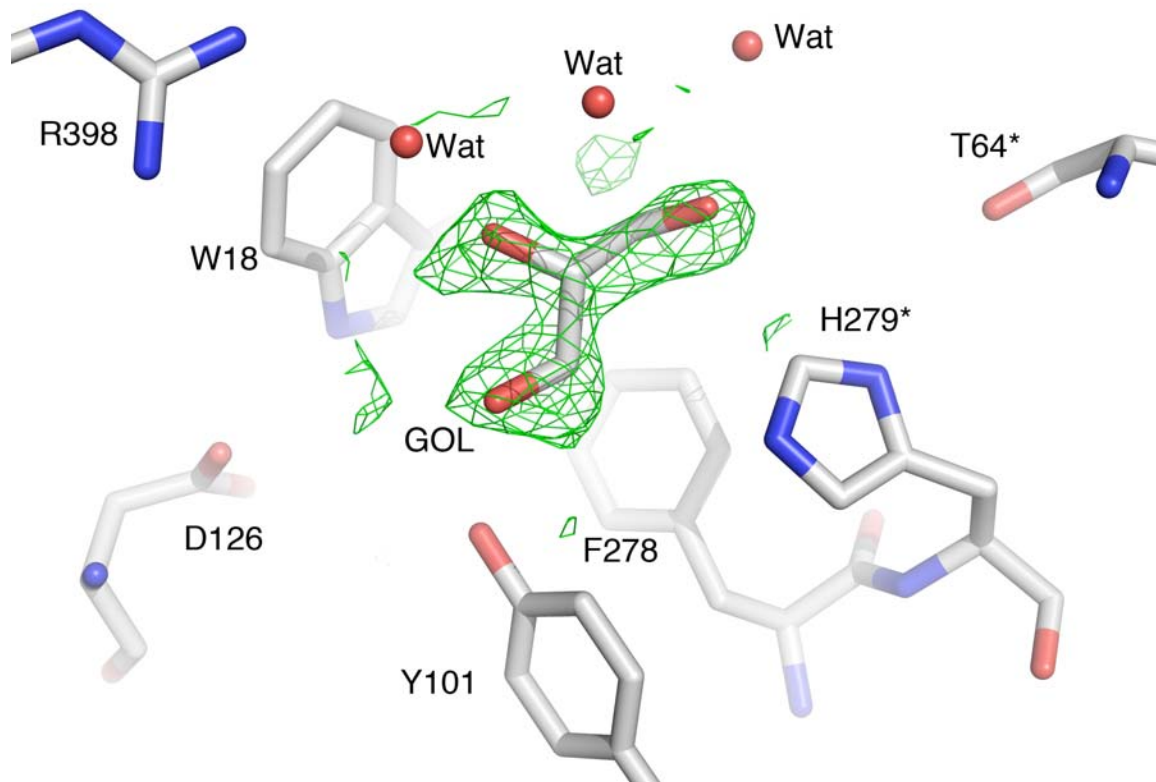

Fig – S3

This figure shows the omit map covering IAC, GOL and the around area calculated without IAC and GOL. The  $F_o - F_c$  electron density map is contoured at the 2.5 sigma level.

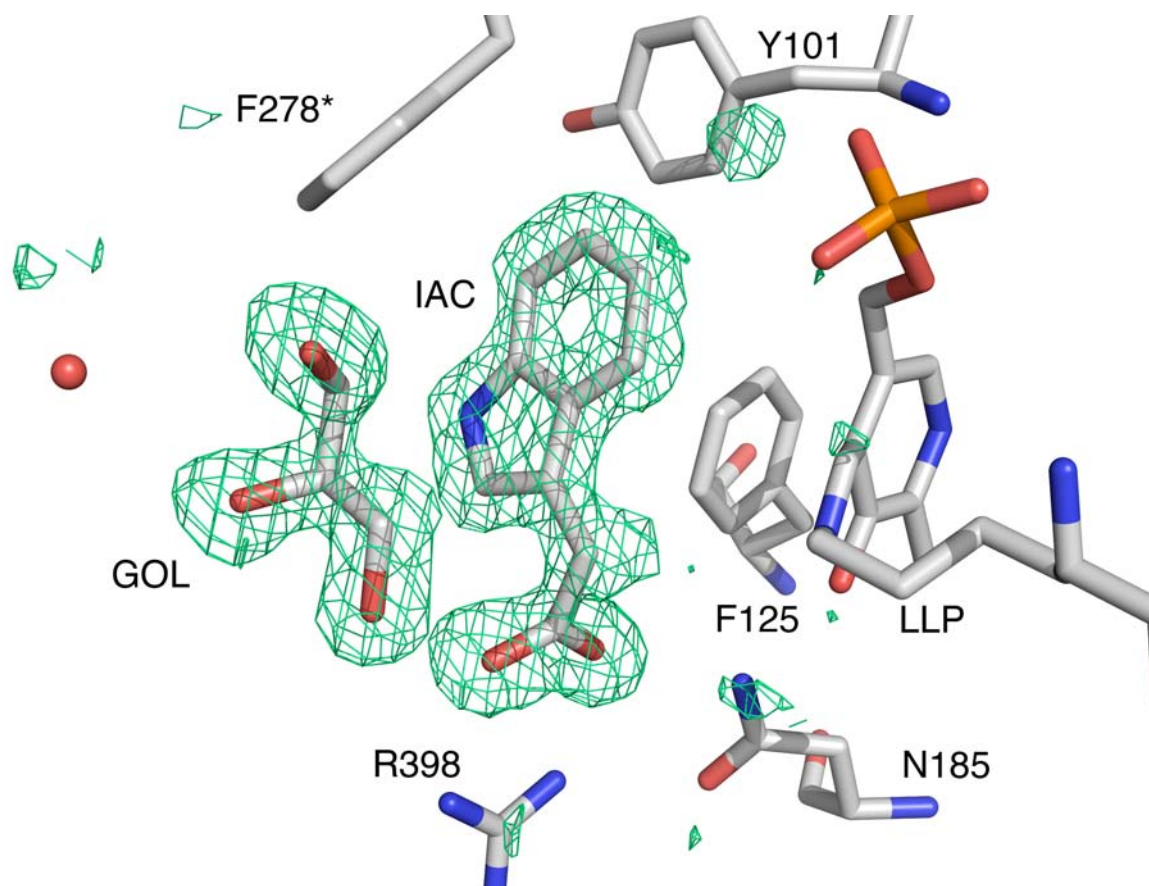

Fig – S4

This figure shows the omit map covering Na atom and 5 water molecules and the around area calculated without Na atom and 5 water molecules. The  $F_o - F_c$  electron density map is contoured at the 2 sigma level.

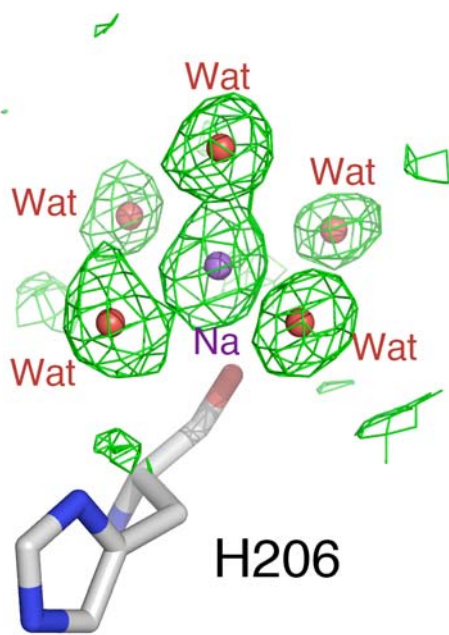

Supplement: NIHMS175800-supplement-supp.pdf [file NIHMS175800-supplement-supp.pdf]
